# Supplementary material for: Piezotronics boosted plasmonic localization and hot electron injection of coralline-like Ag/BaTiO3 nanoarrays for photocatalytic application
Source: Royal Society of Chemistry journal article supplement (doi:10.1039/d1tc02559g), 2021-01-01
Supplement: d1tc02559g1.pdf [file d1tc02559g1.pdf]

**Piezotronics boosted plasmonic localization and hot electron injection of coralline-like Ag/BaTiO<sub>3</sub> nanoarrays for photocatalytic application**

Yongming Fu,<sup>a</sup> Zeqian Ren,<sup>a</sup> Lixia Guo,<sup>a</sup> Xiu Li,<sup>a</sup> Yuqing Li,<sup>a,b</sup> Wenliang Liu,<sup>a,b</sup> Peng Li,<sup>a</sup>  
Jizhou Wu<sup>\*ab</sup> and Jie Ma<sup>\*a,b</sup>

<sup>a</sup> School of Physics and Electronic Engineering, Institute of Laser Spectroscopy, State Key Laboratory of Quantum Optics and Quantum Optics Devices, Shanxi University, Taiyuan 030006, China.

<sup>b</sup> Collaborative Innovation Center of Extreme Optics, Shanxi University, Taiyuan 030006, China.

\* Corresponding Authors.

E-mail: wujz@sxu.edu.cn (J. Wu), mj@sxu.edu.cn (J. Ma)

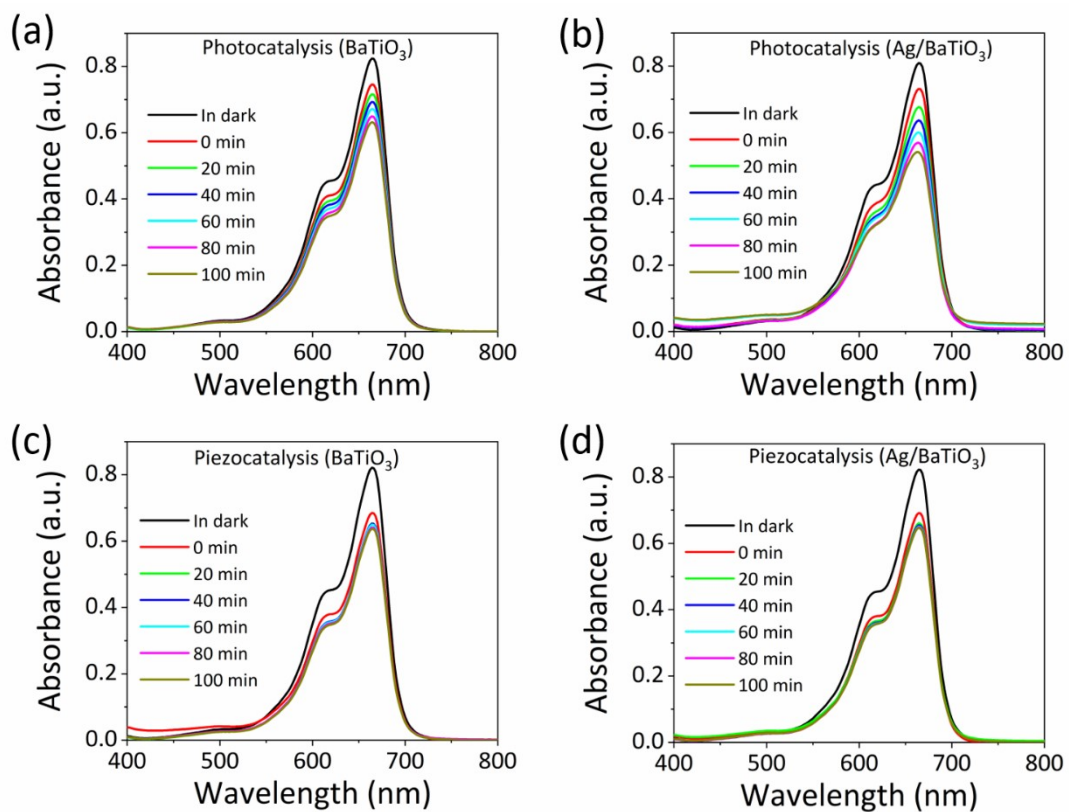

**Fig. S1** The photocatalytic and piezocatalytic degradation performances of  $\text{BaTiO}_3$  and  $\text{Ag/BaTiO}_3$  nanoarrays. (a) Photocatalysis of  $\text{BaTiO}_3$ . (b) Photocatalysis of  $\text{Ag/BaTiO}_3$ . (c) Piezocatalysis of  $\text{BaTiO}_3$ . (d) Piezocatalysis of  $\text{Ag/BaTiO}_3$ .
